# Supplementary material for: Fabrication, characterization, and optimization of a novel copper-incorporated chitosan/gelatin-based scaffold for bone tissue engineering applications
Source: PubMed Central journal article supplement — Bioimpacts. 2021 Oct 11;12(3):233–46. doi: 10.34172/bi.2021.23451 (PMC9124876; doi:10.34172/bi.2021.23451), 2021-10-11
Supplement: bi-12-233-s001.pdf [file bi-12-233-s001.pdf]

## Supplementary file 1

Bozorgi et al., *BiolImpacts*, 2022, 12(3), 233-246

doi: [10.34172/bi.2021.23451](https://doi.org/10.34172/bi.2021.23451)

<http://bi.tbzmed.ac.ir/>

# Fabrication, characterization, and optimization of a novel copper-incorporated chitosan/gelatin-based scaffold for bone tissue engineering applications

Azam Bozorgi<sup>1</sup>, Masoud Mozafari<sup>1</sup>, Mozafar Khazaei<sup>2</sup>, Mansooreh Soleimani<sup>3,4\*</sup>, Zahra Jamalpoor<sup>5\*</sup>

<sup>1</sup>Department of Tissue Engineering and Regenerative Medicine, Faculty of Advanced Technologies in Medicine, Iran University of Medical Sciences, Tehran, Iran

<sup>2</sup>Fertility and Infertility Research Center, Health Technology Institute, Kermanshah University of Medical Sciences, Kermanshah, Iran

<sup>3</sup>Cellular and Molecular Research Center, Iran University of Medical Sciences, Tehran, Iran

<sup>4</sup>Department of Anatomy, School of Medicine, Iran University of Medical Sciences, Tehran, Iran

<sup>5</sup>Trauma Research Center, Aja University of Medical Sciences, Tehran, Iran

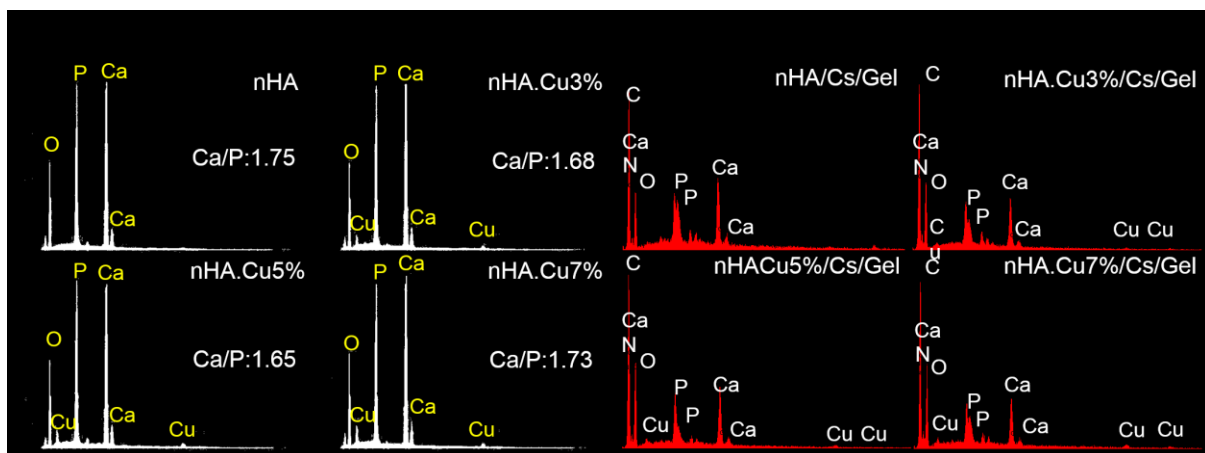

Figure S1.
